# Supplementary material for: An Exploration of Traditional Chinese Medicinal Plants with Anti‐Inflammatory Activities
Source: Hindawi journal article supplement (doi:10.1155/2017/1231820), 2017-01-01
Supplement: f1 [file 1231820.f1.pdf]

## SUPPORTING INFORMATION

S1 Fig

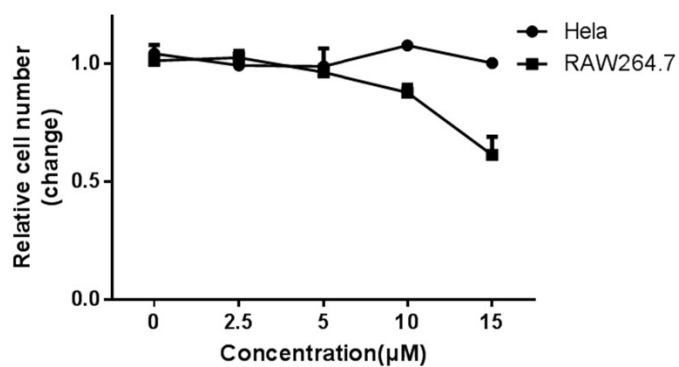

S1 Fig: Cytotoxicity of parthenolide in RAW 264.7 macrophages and HeLa cells. Cells were incubated with parthenolide (2.5, 5, 10 and 15  $\mu\text{M}$ ) for 24 h. The cell viability was tested by MTT assay. The data were expressed as mean  $\pm$  S.E.M.
